# Supplementary material for: Inverse transport modeling of volcanic sulfur dioxide emissions using large-scale simulations
Source: Copernicus journal article supplement (doi:10.5194/gmd-9-1627-2016), 2016-05-02
Supplement: Supplementary file 1 [file gmd-9-1627-2016-supplement.zip]

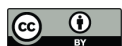

## *Supplement of*

# **Inverse transport modeling of volcanic sulfur dioxide emissions using large-scale simulations**

**Yi Heng et al.**

*Correspondence to:* Yi Heng (y.heng@fz-juelich.de, hengyi@mail.sysu.edu.cn)

- gmd-9-1627-2016-supplement-title-page.pdf
- gmd-2015-174-supplement
  - README.txt
  - emission\_rates.txt

The copyright of individual parts of the supplement might differ from the CC-BY 3.0 licence.
